# Supplementary material for: Systemic inflammation induced by exacerbation of COPD or pneumonia in patients with COPD induces cardiac troponin elevation
Source: PubMed Central journal article supplement — BMJ Open Respir Res. 2021 Aug 27;8(1):e000997. doi: 10.1136/bmjresp-2021-000997 (PMC8404456; doi:10.1136/bmjresp-2021-000997), 2021-08-27
Supplement: bmjresp-2021-000997supp001.pdf [file bmjresp-2021-000997supp001.pdf]

Online figure 1. Distribution of high-sensitivity Troponin T (hs-cTnT).

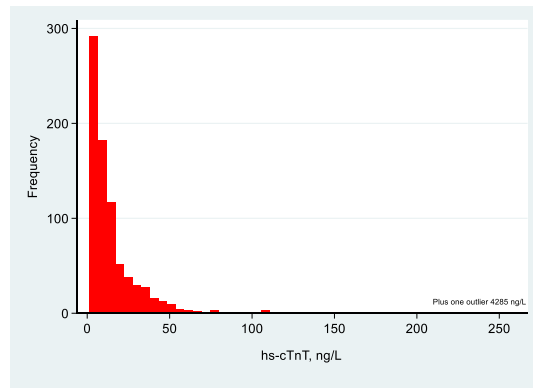

(The outlier had acute myocardial infarction).

#### Mediation, prerequisites:

In our settings, the variable (M) was considered as a mediator of the relationship between the disease (D) and hs-cTnT provided that:

1. M was significantly associated with D ( $\beta_1$ , Equation 1).
2. In a model with hs-cTnT as the outcome using D and M as explanatory variables, M was significantly associated with hs-cTnT ( $\theta_2$ , Equation 2).
3. In a model without M, D was significantly associated with hs-cTnT ( $T_1$ , Equation 3).
4. In a model with M and D, the association between D and the hs-cTnT attenuated substantially ( $\theta_1$ , Equation 2).

In these analyses, we first investigated the association between M and D between M and relevant covariates (c), (eq 1). In these analyses, CRP as well as leucocytes were log-transformed. Thereby, we estimated the coefficients ( $\beta_1$ ) between M and D. Second, we investigated the relationship between the outcome variable expressed as log-transformed hs-cTnT ( $\ln\_cnt$ ), using D, M and relevant covariates (c) as explanatory covariates (eq 2). Thereby, we estimated the relationship between  $\ln\_cnt$  and D ( $\theta_1$ ). Third, we removed M from eq 2 and estimated the relationship between  $\ln\_cnt$  and D ( $T_1$ ) unconditionally of M but kept the covariates (c). Finally, the indirect association between  $\ln\_cnt$  was calculated as the difference between  $\beta_1$  and  $\beta_0$  (eq 3:  $IE = \beta_1 - \beta_0$ ). The corresponding z-score (and p-values) were obtained using bootstrapping.

Online figure 2.

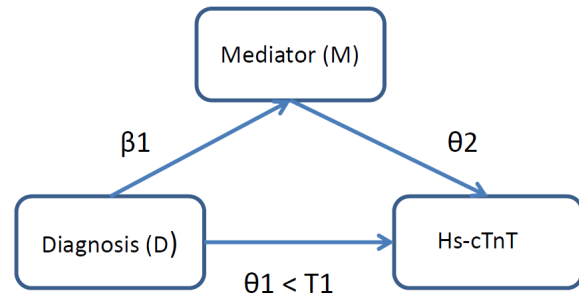

- Eq 1:  
 $E(M | D, c1) = \beta_0 + \beta_1 * D + \beta_{11} * c1$
- Eq 2:  
 $E(\ln\_cntnt | D, M, c2) = \theta_0 + \theta_1 * D + \theta_2 * M + \beta_{22} * c2$
- Eq 3:  
 $E(\ln\_cntnt | D, c2) = T_0 + T_1 * D + \beta_{32} * c2$
- Direct effect:  $\theta_1$
- Indirect effect:  $IE = T_1 - \theta_1$
- Total effect:  $T_1$
- $c1, c2$ : other covariates in eq 1, eq 2 and 3, respectively.

The relationship between  $\ln\_cntnt$  as the outcome variable and diagnoses with biomarkers as well as baseline hs-cTnT and follow-up time as covariates were estimated using linear mixed model (four models). In these analyses we used multiple imputations for C-reactive protein, oxygen tension, and creatinine (we had complete data for leucocytes, see online table 2). Standard errors for IE, and thereby the corresponding p-values, were obtained using bootstrapping. The continuous covariates were included in quartiles.

Online table 1a. The geometric mean of high sensitivity cardiac Troponin T (hs-cTnT), the ratio of hs-cTnT between index-group (Yes) and reference group (No) with geometric standard error (gse) and p-value by categorical covariables and study group at baseline (n = 380).

| Explanatory variables                   | Hs-cTnT, ng/L |     | Ratio (gse, p-value) |
|-----------------------------------------|---------------|-----|----------------------|
|                                         | Yes           | No  |                      |
| Female gender: Yes vs. No               | 5.4           | 8.7 | 0.62 (1.1, <0.001)   |
| Coronary heart disease: Yes vs. No      | 8.8           | 6.8 | 1.3 (1.2, 0.207)     |
| q-wave in electrocardiogram: Yes vs. No | 10.5          | 6.8 | 1.5 (1.2, 0.034)     |
| Arterial hypertension: Yes vs. No       | 8.5           | 5.9 | 1.4 (1.1, <0.001)    |
| Current smoking: Yes vs. No             | 5.9           | 7.4 | 0.79 (1.2, 0.024)    |

Online table 1b. The geometric mean of high sensitivity cardiac Troponin T (hs-cTnT) and the ratio of hs-cTnT (Ratio =  $\text{hs-cTnT}_{Q_{n+1}} / \text{hs-cTnT}_{Q_n}$ ) between quartiles (Q1-4) of hs-cTnT with geometric standard error (gse), by continuous covariates in quartiles measured at baseline (n = 380).

| Variables (quartile limits)                          | Q1   | Q2  | Q3  | Q4   | Ratio <sup>§</sup> | gse  | p-value |
|------------------------------------------------------|------|-----|-----|------|--------------------|------|---------|
| Age, years (60.0; 65.0; 70.0)                        | 4.7  | 6.3 | 7.2 | 10.6 | 1.3                | 1.04 | <0.001  |
| Leucocytes, x10 <sup>9</sup> /litres (5.7; 6.8; 8.1) | 5.8  | 6.2 | 7.3 | 8.6  | 1.1                | 1.05 | 0.002   |
| CRP, mg/litres (1.0; 3.0; 4.0)                       | 6.3  | 6.2 | 6.7 | 8.5  | 1.1                | 1.04 | 0.031   |
| Creatinine, mmol/litres (63.0; 72.0; 84.0)           | 6.1  | 5.5 | 7.0 | 9.5  | 1.2                | 1.04 | <0.001  |
| FEV1, litres (0.9; 1.3; 2.0)                         | 10.2 | 6.8 | 5.4 | 5.8  | 0.82               | 1.04 | <0.001  |
| FVC, litres (2.1; 2.7; 3.5)                          | 8.4  | 6.9 | 6.4 | 5.9  | 0.89               | 1.05 | 0.011   |
| Arterial O2-tension, kPa (8.4; 9.2; 10.2)            | 10.0 | 7.1 | 6.4 | 6.3  | 0.86               | 1.05 | 0.003   |
| Heart Rate, 1/minutes (63; 72; 80)                   | 6.0  | 6.0 | 6.9 | 10.0 | 1.2                | 1.05 | 0.001   |
| Tobacco, pack-years (0.4; 26.4; 45.0)                | 6.1  | 6.8 | 7.1 | 7.7  | 2.1                | 1.04 | 0.086   |

§ Ratio =  $Q_n / Q_{n-1}$

Online Table 1c. Baseline ratio of high-sensitivity troponin T and different levels of relevant covariates in three models using ordinary least square regression with missing values and a model using multiple imputations for missing values.

| Observations (N)                   | Ordinary Least Square Regression without imputation |      |         |         |      |         |         |      |         | Multiple Imputation |      |         |
|------------------------------------|-----------------------------------------------------|------|---------|---------|------|---------|---------|------|---------|---------------------|------|---------|
|                                    | N = 380                                             |      |         | N = 310 |      |         | N = 270 |      |         | N = 380             |      |         |
| Group                              | Ratio                                               | GSE  | p-value | Ratio   | GSE  | p-value | Ratio   | GSE  | p-value | Ratio               | GSE  | p-value |
| References                         | 1.00                                                | -    | -       | 1.00    | -    | -       | 1.00    | -    | -       | 1.00                | -    | -       |
| LTOT candidates                    | 2.82                                                | 1.25 | <0.001  | 2.25    | 1.28 | 0.001   | Omitted |      |         | 1.43                | 1.41 | 0.295   |
| Rehabilitation group               |                                                     |      |         |         |      |         |         |      |         |                     |      |         |
| Outpatients                        | 1.33                                                | 1.17 | 0.065   | 1.24    | 1.18 | 0.193   | 0.67    | 1.29 | 0.118   | 1.08                | 1.36 | 0.794   |
| Institutional                      | 1.36                                                | 1.14 | 0.017   | 1.46    | 1.15 | 0.007   | 0.67    | 1.26 | 0.086   | 1.03                | 1.34 | 0.930   |
| COPD outpatients                   | 1.09                                                | 1.17 | 0.578   | Omitted |      |         | 0.39    | 1.27 | <0.001  | 0.60                | 1.36 | 0.102   |
| Sex: female vs. male               | 0.60                                                | 1.09 | <0.001  | 0.63    | 1.11 | <0.001  | 0.60    | 1.13 | <0.001  | 0.59                | 1.11 | <0.001  |
| Age in quartiles                   | 1.25                                                | 1.04 | <0.001  | 1.22    | 1.05 | <0.001  | 1.12    | 1.05 | 0.035   | 1.16                | 1.04 | <0.001  |
| Pack-years in quartiles            |                                                     |      |         | 0.95    | 1.05 | 0.302   | 1.01    | 1.05 | 0.901   | 0.97                | 1.04 | 0.488   |
| Arterial hypertension: Y vs. N     |                                                     |      |         | 1.30    | 1.11 | 0.013   | 1.25    | 1.11 | 0.040   | 1.24                | 1.10 | 0.018   |
| Coronary arterial disease: Y vs. N |                                                     |      |         | 1.25    | 1.25 | 0.302   | 1.06    | 1.25 | 0.793   | 1.03                | 1.21 | 0.880   |
| Q-wave ECG: Y vs. N                |                                                     |      |         | 1.22    | 1.20 | 0.286   | 1.18    | 1.20 | 0.352   | 1.17                | 1.17 | 0.317   |
| Heart rate in quartiles            |                                                     |      |         | 1.19    | 1.05 | <0.001  | 1.07    | 1.05 | 0.201   | 1.09                | 1.04 | 0.040   |
| Continuous covariates in quartiles |                                                     |      |         |         |      |         |         |      |         |                     |      |         |
| Creatinine                         |                                                     |      |         |         |      |         | 1.12    | 1.06 | 0.032   | 1.14                | 1.05 | 0.006   |
| C-reactive protein                 |                                                     |      |         |         |      |         | 1.00    | 1.05 | 0.920   | 1.02                | 1.04 | 0.657   |
| Peripheral leucocytes              |                                                     |      |         |         |      |         | 1.04    | 1.05 | 0.387   | 1.05                | 1.04 | 0.224   |
| FEV1                               |                                                     |      |         |         |      |         | 0.76    | 1.06 | <0.001  | 0.76                | 1.05 | <0.001  |
| Arterial O2-tension                |                                                     |      |         |         |      |         | 0.93    | 1.06 | 0.197   | 0.93                | 1.05 | 0.116   |

GSE: geometric standard error, LTOT: long-term oxygen treatment, COPD: chronic obstructive pulmonary disease, ECG: electrocardiogram, FEV1: forced expiratory volume in 1 second.

Online table 2. The number of complete data, the percent of imputed numbers and the total number by baseline model and longitudinal models.

| Variable, quartiles              | Complete | Imputed, % | Total |
|----------------------------------|----------|------------|-------|
| Baseline model                   |          |            |       |
| Arterial O <sub>2</sub> -tension | 305      | 20         | 380   |
| Heart rate                       | 310      | 18         | 380   |
| Q-wave ECG                       | 310      | 18         | 380   |
| C-Reactive Protein               | 353      | 7          | 380   |
| Longitudinal models              |          |            |       |
| Arterial O <sub>2</sub> -tension | 770      | 4          | 801   |
| C-Reactive Protein               | 800      | 0          | 801   |
| Creatinine                       | 667      | 17         | 801   |
| Leucocytes                       | 801      | 0          | 801   |
| Heart rate                       | 786      | 2          | 801   |

Online table 3. International Classification of Disease code (ICD10), text explanation, the number of hs-cTnT measurements at baseline (N) and during the follow-up (n), and the corresponding geometric mean (gm) and geometric standard deviation (gsd) of high-specific Cardiac Troponin by Diagnoses at the follow-up.

| ICD10                      | Diagnosis, text                                            | N   | n   | n/N, % | Baseline |     | Hospitalised |     |
|----------------------------|------------------------------------------------------------|-----|-----|--------|----------|-----|--------------|-----|
|                            |                                                            |     |     |        | gm       | gsd | gm           | gsd |
| Acute Exacerbation of COPD |                                                            |     |     |        |          |     |              |     |
| J44.0                      | COPD with acute infection in the lower respiratory airways | 19  | 17  | 89     | 15.2     | 1.9 | 34.9         | 2.1 |
| J44.1                      | Unspecified acute exacerbation of COPD                     | 130 | 122 | 94     | 12.2     | 2.5 | 18.2         | 2.1 |
| J96.0                      | Acute Respiratory Failure                                  | 1   | 1   | 100    | 14.4     |     | 21.0         |     |
|                            | Sum                                                        | 150 | 140 | 93     | 12.6     | 2.4 | 19.7         | 2.1 |
| Pneumonia                  |                                                            |     |     |        |          |     |              |     |
| J13                        | Pneumonia due to P.pneumonia                               | 5   | 4   | 80     | 12.2     | 4.2 | 17.8         | 1.8 |
| J14                        | Pneumonia due to H.Influenzae                              | 1   | 1   | 100    | 13.0     |     | 14.0         |     |
| J15                        | Bacterial Pneumonia, not elsewhere classified              | 22  | 17  | 77     | 14.2     | 2.1 | 31.3         | 2.4 |
| J18                        | Pneumonia, unspecified organism                            | 52  | 45  | 87     | 13.3     | 2.7 | 17.8         | 2.6 |
|                            | Sum                                                        | 80  | 67  | 84     | 13.5     | 2.6 | 20.5         | 2.5 |
| Other Lung diseases        |                                                            |     |     |        |          |     |              |     |

|                                    |                                                      |    |    |     |      |     |       |     |
|------------------------------------|------------------------------------------------------|----|----|-----|------|-----|-------|-----|
| J09                                | Influenza due to certain identified viruses          | 1  | 1  | 100 | 12.9 |     | 29.0  |     |
| J10                                | Influenza due to other identified viruses            | 3  | 3  | 100 | 11.4 | 2.2 | 43.7  | 2.9 |
| J12                                | Viral pneumonia                                      | 3  | 3  | 100 | 5.7  | 1.3 | 4.7   | 2.7 |
| J20                                | Acute bronchitis                                     | 3  | 2  | 67  | 9.7  | 1.4 | 28.4  | 1.1 |
| J22                                | Unspecified lower respiratory infection              | 1  | 0  | 0   | 7.1  |     |       |     |
| J33                                | Nasal polyp                                          | 1  | 0  | 0   | 14.0 |     |       |     |
| J43                                | Emphysema                                            | 2  | 1  | 50  | 15.8 | 2.8 | 15.0  |     |
| J44                                | Other chronic obstructive disease                    | 8  | 4  | 50  | 19.8 | 3.0 | 23.8  | 1.7 |
| J47                                | Bronchiectasis                                       | 1  | 0  | 0   | 10.0 |     |       |     |
| J84                                | Other interstitial pulmonary diseases                | 1  | 0  | 0   | 3.9  |     |       |     |
| J85                                | Abscess of lung or mediastinum                       | 2  | 0  | 0   | 38.9 | 1.3 |       |     |
| J90                                | Pleural effusion, not elsewhere classified           | 1  | 0  | 0   | 31.2 |     |       |     |
| J93                                | Pneumothorax                                         | 5  | 2  | 40  | 6.5  | 2.4 | 13.6  | 4.1 |
| J96                                | Respiratory failure, not elsewhere classified        | 11 | 5  | 45  | 6.8  | 2.2 | 8.8   | 1.7 |
|                                    | Sum                                                  | 43 | 21 | 49  | 10.4 | 2.5 | 15.5  | 2.7 |
| Non-respiratory infections         |                                                      |    |    |     |      |     |       |     |
| A04                                | Other intestinal infections                          | 1  | 1  | 100 | 6.0  |     | 13.5  |     |
| A09                                | Other gastroenteritis and colitis, unspecified agent | 3  | 3  | 100 | 5.3  | 4.3 | 13.5  | 2.6 |
| A46                                | Erysipelas                                           | 1  | 1  | 100 | 13.0 |     | 15.0  |     |
| A49                                | Bacterial infection, unspecified                     | 1  | 1  | 100 | 45.9 |     | 162.0 |     |
|                                    | Sum                                                  | 6  | 6  | 100 | 9.0  | 3.5 | 25.4  | 3.3 |
| Diseases of the circulatory system |                                                      |    |    |     |      |     |       |     |
| I11                                | Hypertensive heart disease                           | 1  | 1  | 100 | 11.0 |     | 22.0  |     |
| I20                                | Angina pectoris                                      | 12 | 12 | 100 | 11.3 | 1.3 | 14.6  | 2.5 |
| I21                                | Acute myocardial infarction                          | 7  | 7  | 100 | 7.4  | 2.1 | 161.5 | 6.2 |
| I24                                | Other acute ischaemic heart disease                  | 1  | 1  | 100 | 11.0 |     | 11.0  |     |
| I25                                | Chronic ischaemic heart disease                      | 8  | 7  | 88  | 10.6 | 1.7 | 15.9  | 2.8 |
| I26                                | Pulmonary embolism                                   | 2  | 2  | 100 | 12.6 | 1.4 | 14.5  | 1.0 |
| I42                                | Acute myocarditis                                    | 2  | 2  | 100 | 8.7  | 1.5 | 78.2  | 1.5 |
| I46                                | Cardiac arrest                                       | 1  | 1  | 100 | 2.1  |     | 6.2   |     |
| I48                                | Atrial fibrillation and flutter                      | 6  | 6  | 100 | 4.6  | 3.0 | 28.2  | 2.1 |
| I50                                | Heart failure                                        | 3  | 2  | 67  | 18.4 | 2.2 | 15.5  | 1.0 |
| I60                                | Subarachnoid haemorrhage                             | 1  | 1  | 100 | 14.0 |     | 262.0 |     |

|                                  |                                                                  |    |    |     |      |     |      |     |
|----------------------------------|------------------------------------------------------------------|----|----|-----|------|-----|------|-----|
| I61                              | Intracerebral haemorrhage                                        | 2  | 2  | 100 | 4.7  | 1.5 | 7.1  | 1.6 |
| I63                              | Cerebral infarction                                              | 3  | 3  | 100 | 13.6 | 2.5 | 7.1  | 4.9 |
| I67                              | Other cerebrovascular disease                                    | 1  | 1  | 100 | 14.0 |     |      |     |
| I71                              | Aortic aneurysm and dissection                                   | 1  | 0  | 0   | 9.3  |     |      |     |
| I81                              | Phlebitis and thrombophlebitis                                   | 1  | 0  | 0   | 12.6 |     |      |     |
|                                  | Sum                                                              | 52 | 48 | 92  | 9.5  | 1.9 | 26.8 | 3.9 |
| Cancer                           |                                                                  |    |    |     |      |     |      |     |
| C21                              | Malignant neoplasm of anus and anal canal                        | 1  | 0  | 0   | 3.0  |     | 32.0 |     |
| C25                              | Malignant neoplasm of pancreas                                   | 2  | 1  | 50  | 10.8 | 3.4 | 32.0 |     |
| C34                              | Malignant neoplasm of bronchus and lung                          | 8  | 3  | 38  | 7.7  | 1.6 | 38.7 | 2.0 |
| C50                              | Malignant neoplasm of the breast                                 | 1  | 0  | 0   | 4.6  |     |      |     |
| C61                              | Malignant neoplasm of prostate                                   | 1  | 1  | 100 | 12.9 |     | 17.0 |     |
| C64                              | Malignant neoplasm of the kidney, except renal pelvis            | 2  | 1  | 50  | 13.6 | 3.2 | 38.0 |     |
| C67                              | Malignant neoplasm of the bladder                                | 3  | 1  | 33  | 8.2  |     | 15.0 |     |
| C72                              | Malignant neoplasm of the spinal cord, cranial nerves and others | 1  | 0  | 0   | 5.9  |     |      |     |
| C78                              | Secondary malignant neoplasm of respiratory and digestive sites  | 1  | 1  | 100 | 14.4 |     | 16.0 |     |
| C90                              | Multiple myeloma                                                 | 1  | 1  | 100 | 8.9  |     | 5.0  |     |
|                                  | Sum                                                              | 21 | 9  | 43  | 8.3  | 1.9 | 22.4 | 2.2 |
| Diseases of the digestive system |                                                                  |    |    |     |      |     |      |     |
| K21                              | Gastro-oesophageal reflux disease                                | 2  | 1  | 50  | 3.4  | 1.2 | 5.0  |     |
| K29                              | Gastritis and duodenitis                                         | 4  | 4  | 100 | 14.3 | 8.4 | 17.7 | 2.9 |
| K35                              | Acute appendicitis                                               | 1  | 0  | 0   | 45.5 |     |      |     |
| K42                              | Umbilical hernia                                                 | 1  | 0  | 0   | 14.0 |     |      |     |
| K44                              | Diaphragmatic hernia                                             | 1  | 1  | 100 | 4.5  |     |      |     |
| K52                              | Other noninfective gastroenteritis and colitis                   | 1  | 0  | 0   | 11.0 |     |      |     |
| K56                              | Paralytic ileus and intestinal obstruction without hernia        | 3  | 0  | 0   | 2.6  | 2.6 |      |     |
| K57                              | Diverticular disease                                             | 4  | 1  | 25  | 9.3  | 2.6 | 27.0 |     |
| K61                              | Abscess of anal and rectal regions                               | 1  | 0  | 0   | 1.5  |     |      |     |
| K62                              | Other diseases of anus and rectum                                | 1  | 0  | 0   | 12.0 |     |      |     |
| K63                              | Other diseases of intestine                                      | 1  | 0  | 0   | 19.0 |     |      |     |
| K72                              | Hepatic failure, not elsewhere classified                        | 4  | 2  | 50  | 11.0 | 2.5 | 9.5  | 2.5 |
| K82                              | Other diseases of the gall bladder                               | 1  | 0  | 0   | 10.5 |     | 1.0  |     |
| K92                              | Other diseases of the digestive system                           | 1  | 1  | 100 | 7.3  |     | 14.0 |     |

|                 |                                                                  |    |    |     |      |      |      |     |
|-----------------|------------------------------------------------------------------|----|----|-----|------|------|------|-----|
|                 | Sum                                                              | 26 | 10 | 38  | 8.3  | 3.1  | 13.3 | 2.3 |
| Symptoms        |                                                                  |    |    |     |      |      |      |     |
| R06             | Abnormalities of breathing                                       | 1  | 0  | 0   | 1.5  |      |      |     |
| R07             | Pain in chest and throat                                         | 17 | 17 | 100 | 8.3  | 1.9  | 8.3  | 1.6 |
| R10             | Abdominal and pelvic pain                                        | 4  | 2  | 50  | 11.8 | 2.9  | 8.9  | 2.3 |
| R11             | Nausea and vomiting                                              | 1  | 1  | 100 | 1.5  |      | 5.0  |     |
| R19             | Other symptoms and signs involving the digestive system and bad. | 1  | 1  | 100 | 8.5  |      | 8.0  |     |
| R33             | Retention of urine                                               | 1  | 0  | 0   | 7.7  |      |      |     |
| R33             | Retention of urine                                               | 2  | 0  | 0   | 11.9 | 1.1  |      |     |
| R42             | Dizziness and giddiness                                          | 1  | 1  | 100 | 8.5  |      | 5.0  |     |
| R55             | Syncope and collapse                                             | 2  | 2  | 100 | 2.1  | 1.6  | 11.2 | 2.4 |
|                 | Sum                                                              | 30 | 24 | 80  | 7.2  | 2.3  | 8.2  | 1.6 |
| Other diagnoses |                                                                  |    |    |     |      |      |      |     |
| D1              | Benign neoplasms of mouth and pharynx                            | 2  | 0  | 0   | 10.4 | 1.1  |      |     |
| D3              | Benign neoplasm of specified organs                              | 1  | 0  | 0   | 3.0  |      |      |     |
| D4              | Benign neoplasm of uncertain origin                              | 1  | 0  | 0   | 10.0 |      |      |     |
| D6              | Aplastic anaemia                                                 | 2  | 1  | 50  | 22.8 | 2.7  | 34.0 |     |
| D7              | Other diseases of blood and blood-forming organs                 | 1  | 0  | 0   | 14.0 |      |      |     |
| E0              | Disease of the thyroid gland                                     | 1  | 0  | 0   | 5.3  |      |      |     |
| E1              | Diabetes mellitus                                                | 2  | 2  | 100 | 15.5 | 2.7  | 19.6 | 2.7 |
| E8              | Metabolic disease, unspecified                                   | 3  | 3  | 100 | 26.3 | 1.5  | 17.0 | 2.9 |
| F0              | Organic mental disorder                                          | 2  | 2  | 100 | 32.5 | 1.0  | 28.1 | 1.3 |
| F4              | Neurotic disorder                                                | 1  | 1  | 100 | 11.0 |      | 11.0 |     |
| G4              | Episodic paroxysmal disorder                                     | 4  | 2  | 50  | 6.8  | 2.6  | 19.9 | 3.1 |
| M1              | Inflammatory polyarthropathies or arthrosis                      | 4  | 0  | 0   | 6.4  | 2.1  |      |     |
| M4              | Dorsopathies, specified                                          | 2  | 0  | 0   | 3.0  | 1.0  |      |     |
| M5              | Dorsopathies, unspecified                                        | 3  | 1  | 33  | 1.9  | 1.5  | 4.0  |     |
| M7              | Other tissue disorders                                           | 1  | 1  | 100 | 12.9 |      |      |     |
| N1              | Renal tubulo-interstitial diseases                               | 2  | 2  | 100 | 22.5 | 2.7  | 73.9 | 2.5 |
| N3              | Other diseases of urinary system                                 | 3  | 2  | 67  | 10.9 | 1.3  | 12.0 | 1.1 |
| N8              | Noninflammatory disorders of female genital tract                | 1  | 0  | 0   | 1.5  |      |      |     |
| Q4              | Other congenital malformations of upper alimentary tract         | 1  | 0  | 0   | 10.4 |      |      |     |
| S0              | Injuries to the head                                             | 3  | 2  | 67  | 13.8 | 12.8 | 24.6 | 9.5 |



|    |                                                                    |    |    |     |      |     |      |     |
|----|--------------------------------------------------------------------|----|----|-----|------|-----|------|-----|
| S2 | Injuries to the thorax                                             | 2  | 0  | 0   | 11.2 | 1.0 |      |     |
| S3 | Injuries to the abdomen, lower back, lumbar spine or pelvis        | 1  | 0  | 0   | 8.0  |     |      |     |
| S4 | Injuries to the shoulder or upper arm                              | 2  | 0  | 0   | 3.4  | 1.0 |      |     |
| S5 | Injuries to the elbow and forearm                                  | 1  | 0  | 0   | 3.5  |     |      |     |
| S6 | Injuries to the wrist and hand                                     | 1  | 0  | 0   | 1.5  |     |      |     |
| S7 | Injuries to the hip and thigh                                      | 6  | 2  | 33  | 14.0 | 1.7 | 54.1 | 2.4 |
| S8 | Injuries to the knee or lower leg                                  | 1  | 0  | 0   | 1.5  |     |      |     |
| T4 | Poisoning to narcotics and psychodysleptics                        | 4  | 3  | 75  | 6.4  | 1.7 | 17.3 | 1.3 |
| T8 | Complication to medical treatment                                  | 3  | 1  | 33  | 6.2  | 3.4 | 36.0 |     |
| Z0 | Health investigation                                               | 1  | 1  | 100 | 11.0 |     | 11.0 |     |
| Z4 | Persons encountering health services for specific procedures       | 1  | 0  | 0   | 11.5 |     |      |     |
| Z5 | Persons with health hazards related to socioeconomic circumstances | 1  | 0  | 0   | 4.5  |     |      |     |
| Z9 | Persons encountering health services in other circumstances        | 1  | 0  | 0   | 7.8  |     |      |     |
|    | Sum                                                                | 65 | 26 | 40  | 8.3  | 2.7 | 21.5 | 2.5 |

Online table 4. The ratio, geometric standard error (gse) and p-value between leucocytes counts, C-reactive protein, and heart rate, respectively, at hospitalization and stable state by relevant covariates.

| Diagnosis Group                  | Leucocytes |      |         | C-reactive protein |      |         | Heart rate |      |         |
|----------------------------------|------------|------|---------|--------------------|------|---------|------------|------|---------|
|                                  | Ratio      | gse  | p-value | Ratio              | gse  | p-value | Ratio      | gse  | p-value |
| COPD exacerbation                | 1.35       | 1.07 | <0.001  | 4.37               | 1.25 | <0.001  | 0.99       | 1.03 | 0.795   |
| Pneumonia                        | 1.25       | 1.09 | 0.012   | 18.28              | 1.31 | <0.001  | 0.99       | 1.03 | 0.732   |
| Other lung diseases              | 1.27       | 1.15 | 0.086   | 2.77               | 1.55 | 0.020   | 1.08       | 1.06 | 0.165   |
| Non-respiratory infections       | 1.73       | 1.22 | 0.005   | 9.35               | 1.87 | <0.001  | 0.93       | 1.04 | 0.043   |
| Circulatory diseases             | 1.28       | 1.11 | 0.017   | 1.55               | 1.41 | 0.200   | 1.03       | 1.03 | 0.381   |
| Cancer                           | 1.64       | 1.25 | 0.026   | 2.29               | 2.04 | 0.244   | 0.97       | 1.08 | 0.692   |
| Digestive diseases               | 1.16       | 1.16 | 0.320   | 1.18               | 1.62 | 0.738   | 1.06       | 1.06 | 0.258   |
| Symptoms                         | 1.39       | 1.13 | 0.009   | 1.83               | 1.51 | 0.142   | 1.04       | 1.03 | 0.297   |
| Other diagnoses                  | 1.37       | 1.25 | 0.154   | 2.03               | 2.01 | 0.309   | 1.01       | 1.04 | 0.872   |
| Follow-up time: years            | 1.01       | 1.02 | 0.770   | 1.00               | 1.08 | 0.962   | 0.97       | 1.01 | <0.001  |
| Continuous covariates: quartiles |            |      |         |                    |      |         |            |      |         |
| Hs-cTnT at stable state          | 1.00       | 1.02 | 0.790   | 1.02               | 1.06 | 0.740   | 1.04       | 1.01 | <0.001  |
| Peripheral leucocytes            | n.i.       |      |         | 1.38               | 1.08 | <0.001  | 1.04       | 1.01 | <0.001  |
| C-Reactive protein               | 1.04       | 1.02 | 0.063   | n.i.               |      |         | 1.01       | 1.01 | 0.324   |
| Creatinine                       | 1.01       | 1.02 | 0.450   | 0.98               | 1.07 | 0.798   | 0.97       | 1.01 | <0.001  |
| Arterial O <sub>2</sub> -tension | 1.00       | 1.02 | 0.851   | 0.85               | 1.07 | 0.014   | 0.98       | 1.01 | 0.017   |
| Heart rate                       | 1.08       | 1.02 | <0.001  | 0.99               | 1.07 | 0.928   | n.i.       |      |         |

n.i.: not included

Online table 5. Ratio (R) with geometric standard error (gse) and p-value (p) between the level of high-sensitive Troponin T (hs-cTnT) at hospitalisation and stable state by diagnosis, study group, hs-cTnT at baseline and covariates at hospitalisation in five different models.

|                                                 | Full Model |      |        | Leucocytes removed |      |        | CRP removed |      |        | Heart Rate removed |      |        | Leuc. + CRP removed |      |        |
|-------------------------------------------------|------------|------|--------|--------------------|------|--------|-------------|------|--------|--------------------|------|--------|---------------------|------|--------|
|                                                 | R          | gse  | p      | R                  | gse  | p      | R           | gse  | p      | R                  | gse  | p      | R                   | gse  | p      |
| AECOPD                                          | 1.08       | 1.12 | 0.513  | 1.16               | 1.12 | 0.182  | 1.14        | 1.12 | 0.243  | 1.06               | 1.12 | 0.602  | 1.25                | 1.11 | 0.036  |
| Pneumonia                                       | 1.01       | 1.15 | 0.929  | 1.08               | 1.15 | 0.609  | 1.14        | 1.14 | 0.318  | 1.00               | 1.15 | 0.989  | 1.25                | 1.14 | 0.084  |
| Other Lung Dis.                                 | 0.96       | 1.24 | 0.839  | 1.01               | 1.24 | 0.953  | 1.01        | 1.24 | 0.975  | 0.96               | 1.25 | 0.865  | 1.09                | 1.24 | 0.708  |
| Non-Resp. Infections                            | 1.79       | 1.36 | 0.061  | 2.03               | 1.36 | 0.022  | 1.94        | 1.36 | 0.032  | 1.73               | 1.36 | 0.079  | 2.28                | 1.36 | 0.007  |
| Circulatory Diseases                            | 1.98       | 1.18 | <0.001 | 2.12               | 1.18 | <0.001 | 1.97        | 1.18 | <0.001 | 1.94               | 1.18 | <0.001 | 2.13                | 1.18 | <0.001 |
| Cancer                                          | 0.73       | 1.42 | 0.370  | 0.82               | 1.42 | 0.564  | 0.75        | 1.42 | 0.405  | 0.72               | 1.42 | 0.345  | 0.85                | 1.42 | 0.650  |
| Digestive Diseases                              | 1.32       | 1.27 | 0.242  | 1.35               | 1.27 | 0.215  | 1.31        | 1.27 | 0.255  | 1.34               | 1.27 | 0.226  | 1.34                | 1.27 | 0.224  |
| Symptom Diagnoses                               | 1.12       | 1.22 | 0.578  | 1.14               | 1.22 | 0.506  | 1.11        | 1.22 | 0.595  | 1.10               | 1.22 | 0.636  | 1.14                | 1.22 | 0.515  |
| Remaining Diagn.                                | 1.22       | 1.41 | 0.556  | 1.29               | 1.41 | 0.459  | 1.23        | 1.41 | 0.548  | 1.22               | 1.41 | 0.557  | 1.31                | 1.41 | 0.437  |
| Follow-up time. Yrs.                            | 1.12       | 1.04 | 0.004  | 1.13               | 1.04 | 0.002  | 1.12        | 1.04 | 0.004  | 1.11               | 1.04 | 0.006  | 1.13                | 1.04 | 0.002  |
| Continuous Covariates in quartiles              |            |      |        |                    |      |        |             |      |        |                    |      |        |                     |      |        |
| hs-cTnT baseline                                | 1.87       | 1.03 | <0.001 | 1.87               | 1.03 | <0.001 | 1.88        | 1.03 | <0.001 | 1.89               | 1.03 | <0.001 | 1.87                | 1.03 | <0.001 |
| Continuous Covariates at admission in quartiles |            |      |        |                    |      |        |             |      |        |                    |      |        |                     |      |        |
| Leucocytes                                      | 1.09       | 1.04 | 0.015  | removed            |      |        | 1.10        | 1.04 | 0.005  | 1.11               | 1.04 | 0.003  | removed             |      |        |
| CRP                                             | 1.08       | 1.04 | 0.038  | 1.09               | 1.04 | 0.015  | removed     |      |        | 1.08               | 1.04 | 0.034  | removed             |      |        |
| Creatinine                                      | 1.06       | 1.03 | 0.052  | 1.07               | 1.03 | 0.034  | 1.06        | 1.03 | 0.058  | 1.05               | 1.03 | 0.111  | 1.07                | 1.03 | 0.036  |
| Arterial O2                                     | 1.01       | 1.03 | 0.823  | 1.01               | 1.03 | 0.845  | 1.00        | 1.03 | 0.995  | 1.00               | 1.03 | 0.954  | 1.00                | 1.03 | 0.948  |
| Heart rate                                      | 1.08       | 1.03 | 0.028  | 1.09               | 1.03 | 0.005  | 1.08        | 1.03 | 0.024  | removed            |      |        | 1.10                | 1.03 | 0.003  |

AECOPD: Acute Exacerbation of COPD ·
